# Supplementary material
Source: PubMed Central journal article supplement (PMC4862455)
Supplement: AAC.00021-16_zac005165117so1.pdf [file AAC.00021-16_zac005165117so1.pdf]

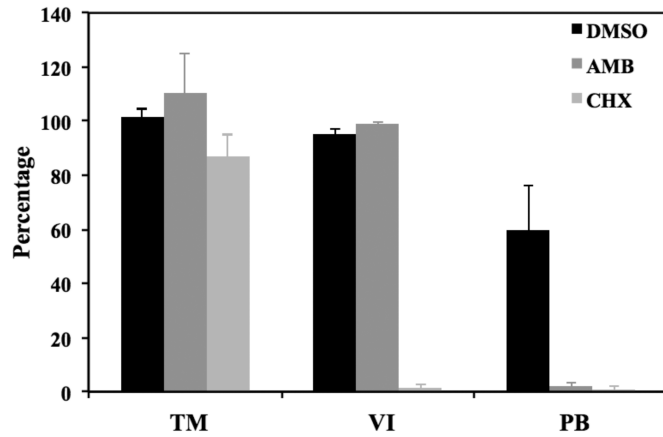

**FIGURE S1. Controls for the phenotypic screen.** We analysed the effect of DMSO, AMB and CHX on intracellular parasites using a visual high content phenotypic assay. We assessed several parameters including the percentage of total cells compared to control cells with DMSO (TM%), the percentage of viable cells (VI%) and the percentage of viable cells with parasitophorous vacuoles that is considered as an indication of parasite burden (PB%).

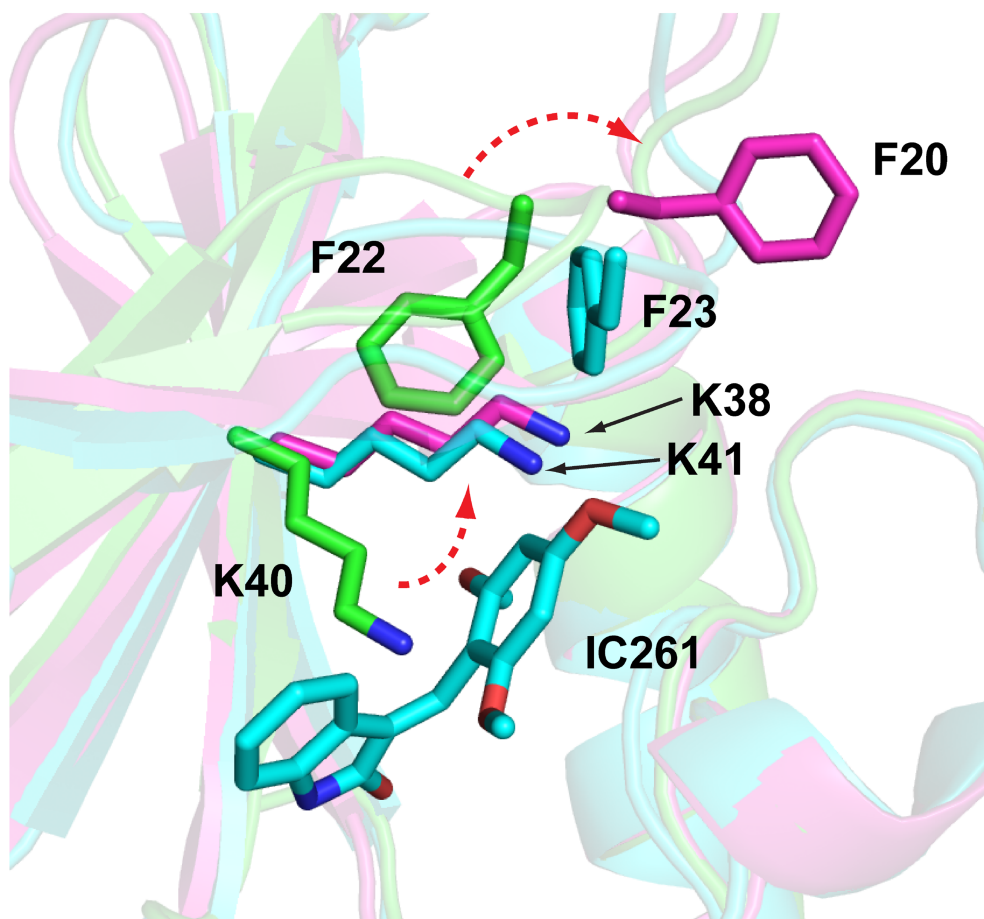

**FIGURE S2. Model of the ATP binding pocket of LmCK1.2 compared to that of human and yeast CK1s.** Comparison of yeast (cyan) and human (magenta) CK1 crystal structures with a structural model of LmCK1.2 (green). IC261 is represented in the ATP-binding pocket.
